# Supplementary material for: The role of cell geometry and cell-cell communication in gradient sensing
Source: PubMed Central journal article supplement (PMC8963572; doi:10.1371/journal.pcbi.1009552), 2022-03-14

# ISD

# NNE

Weak-local

Strong-local

Weak-global

Strong-global

Weak

Strong

7

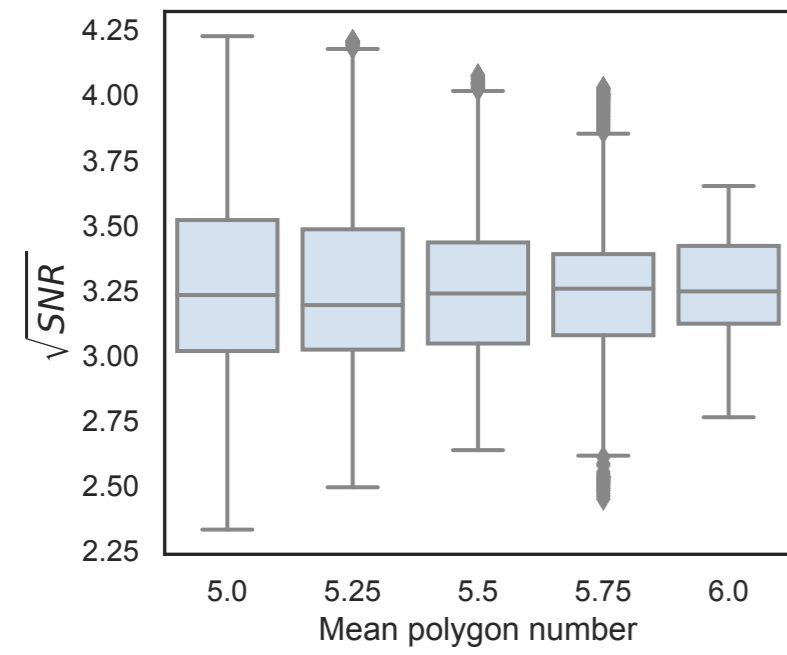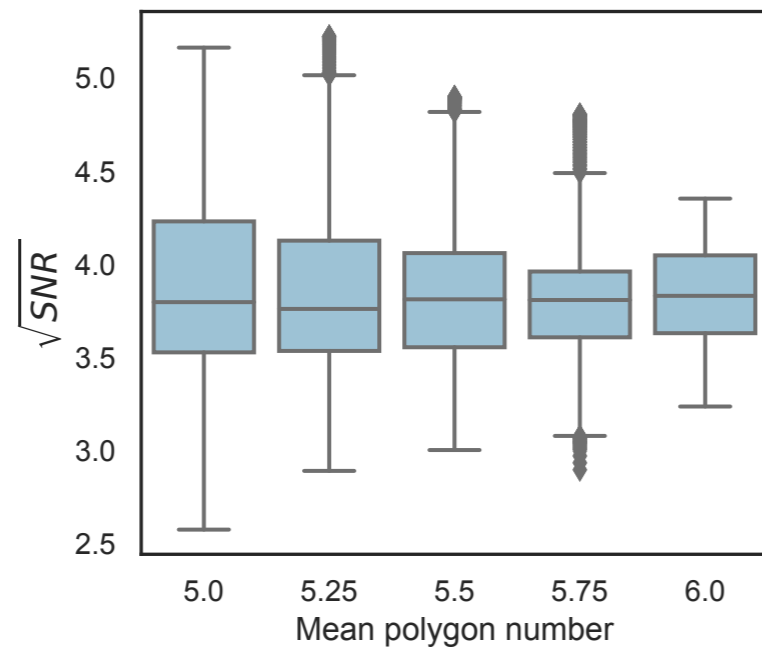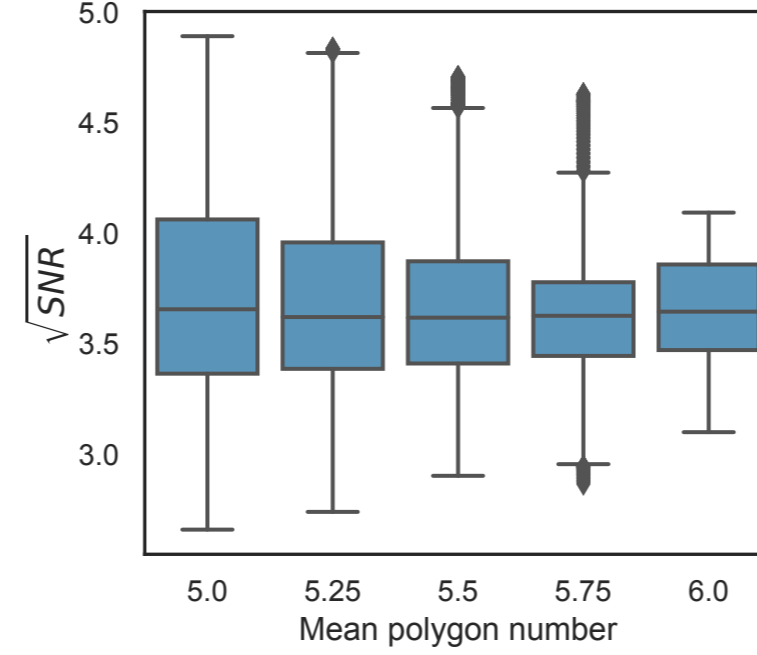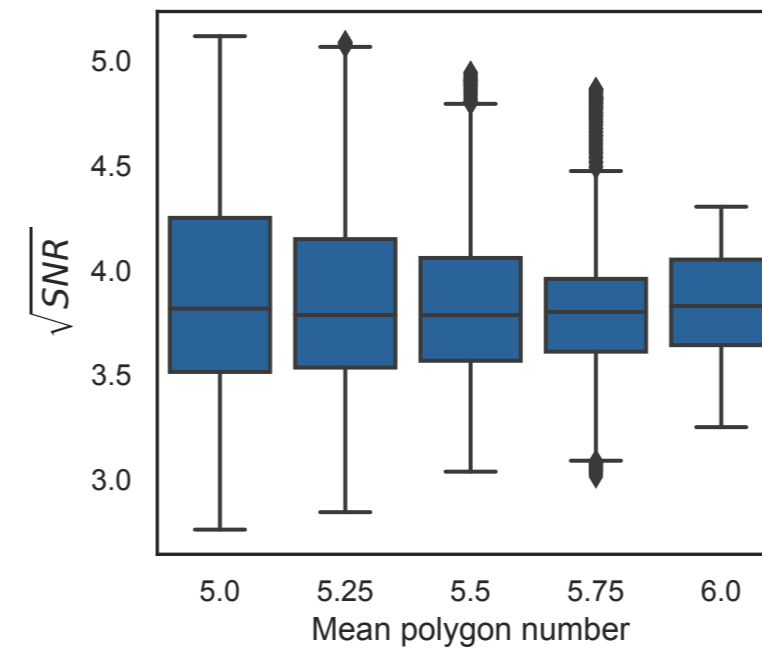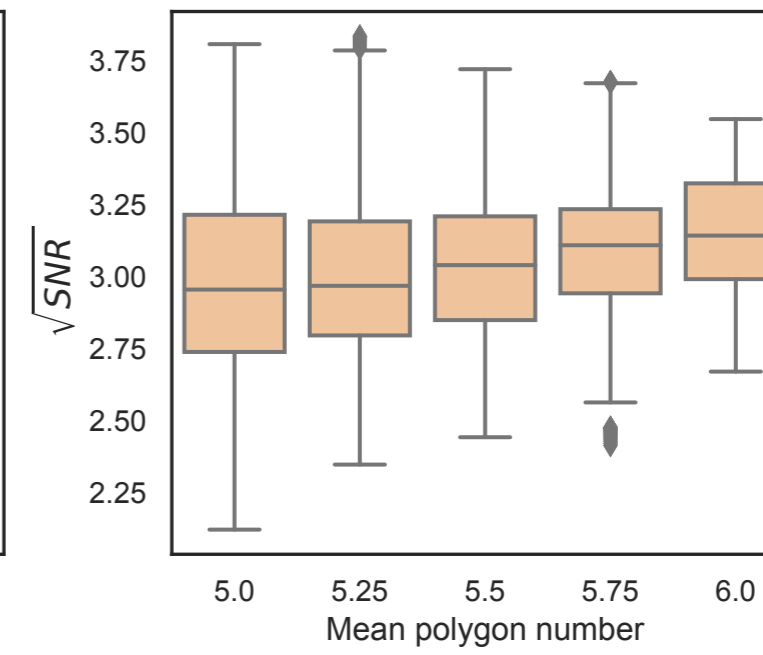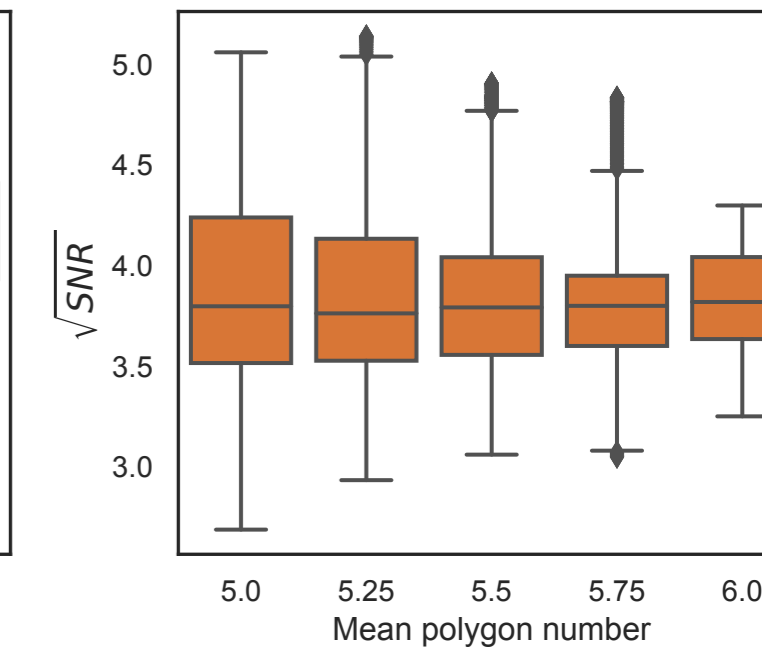

19

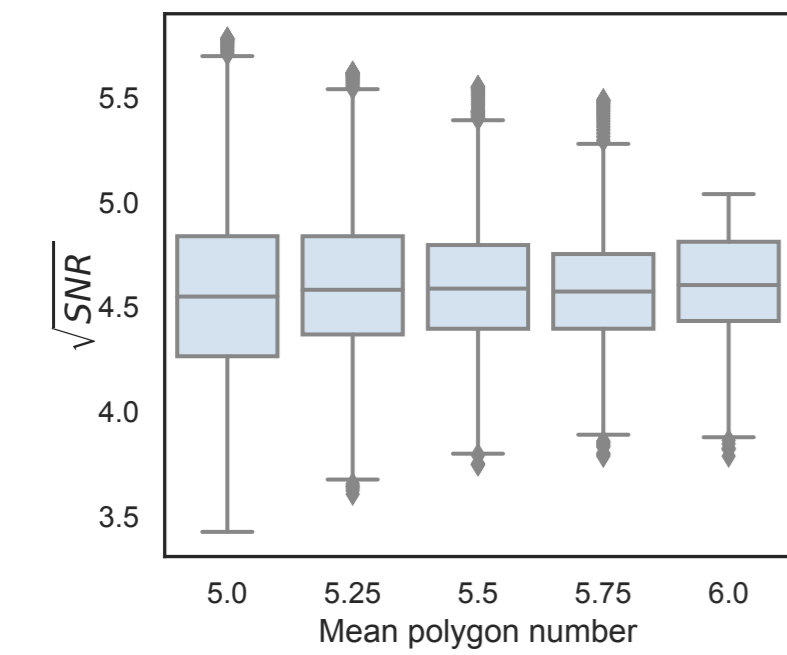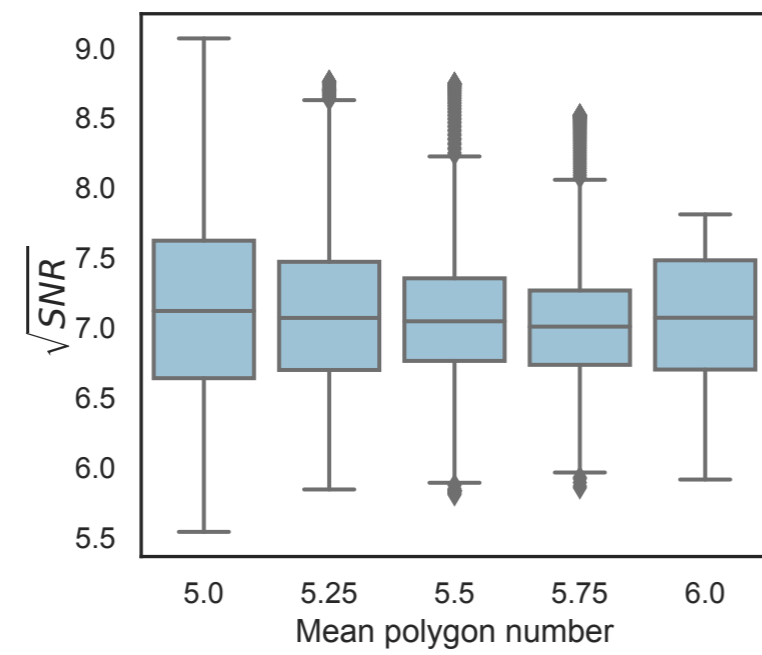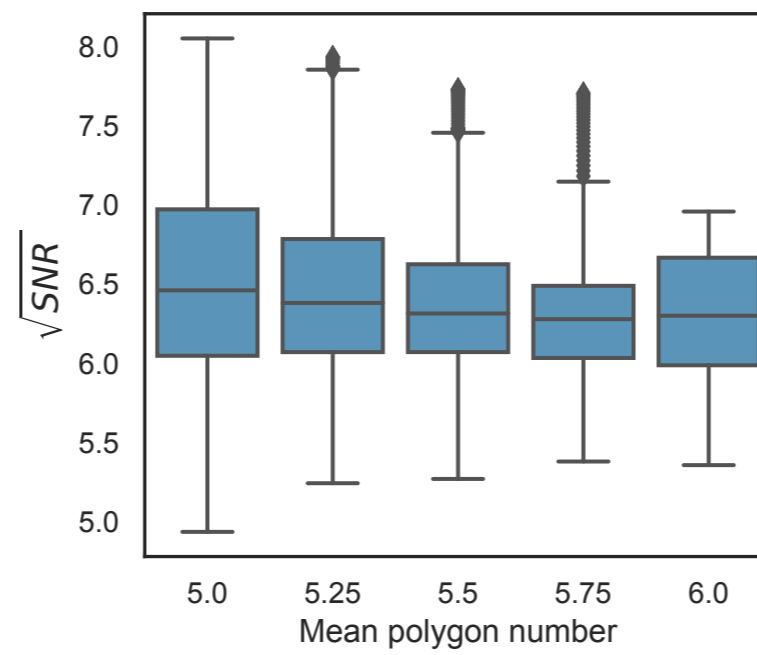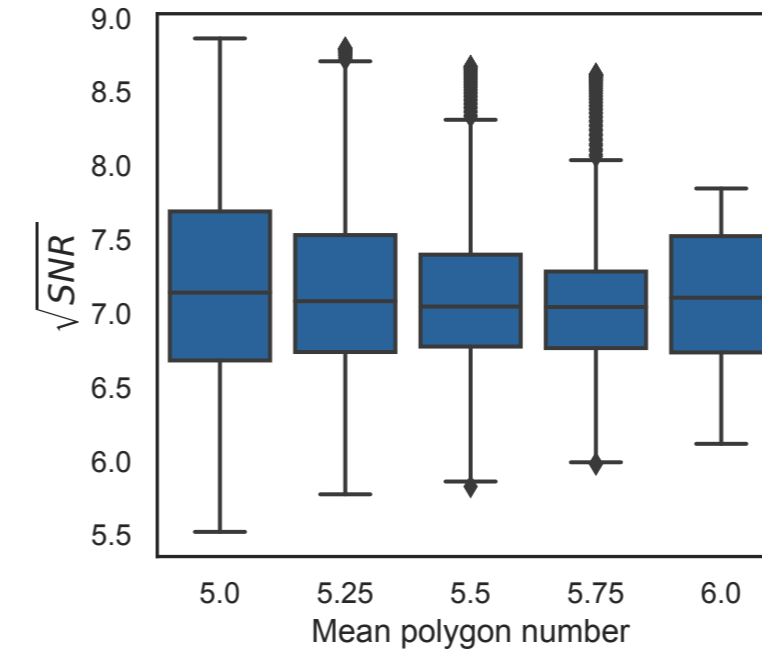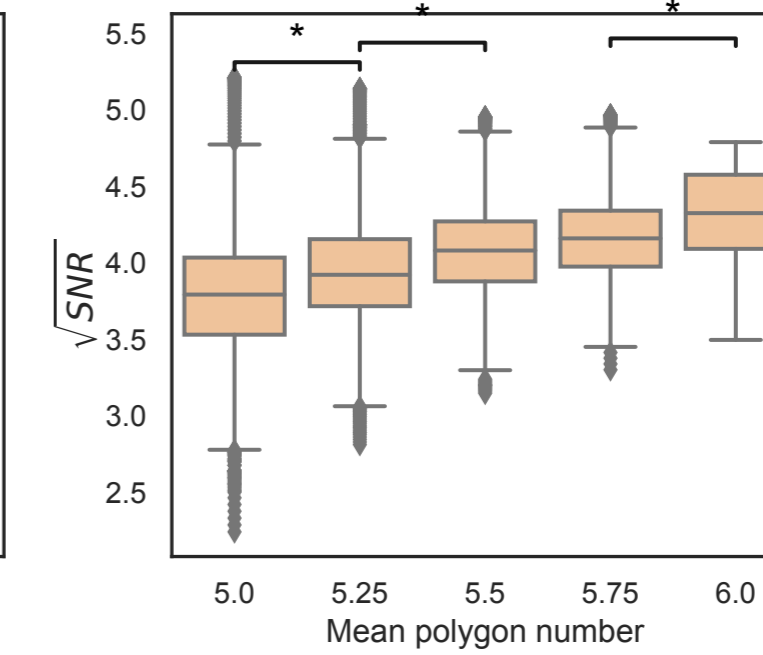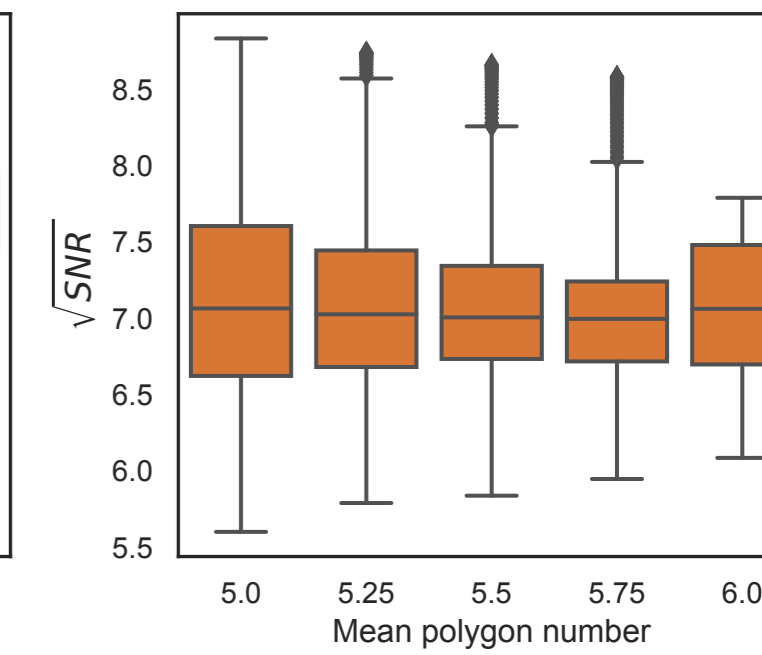

37

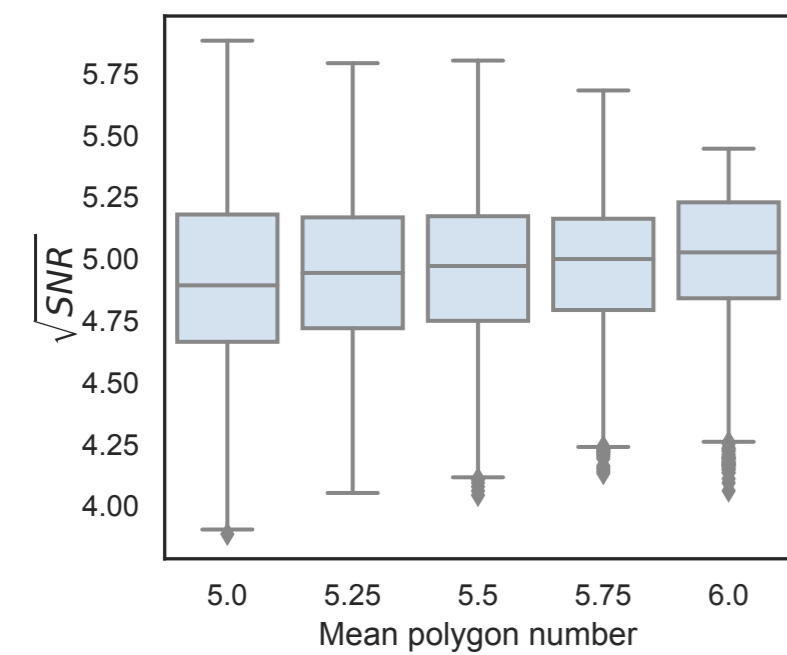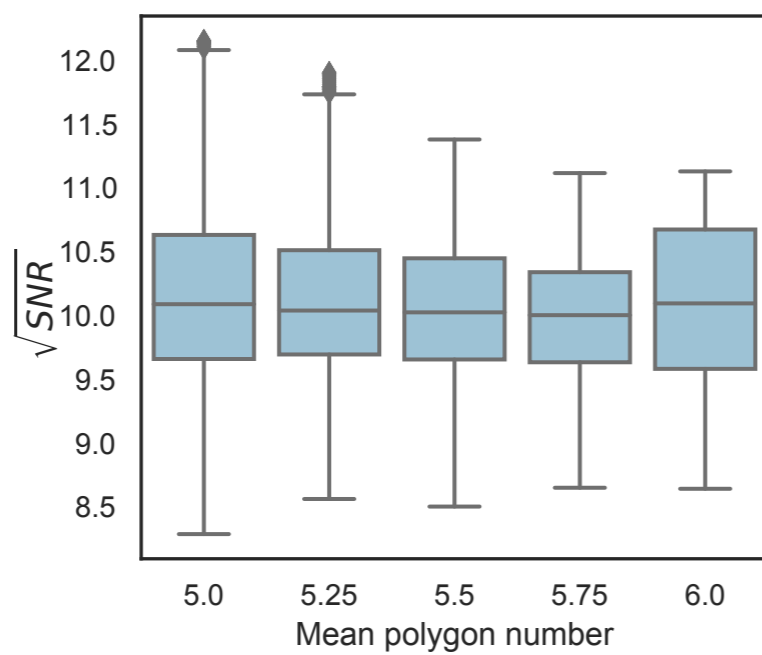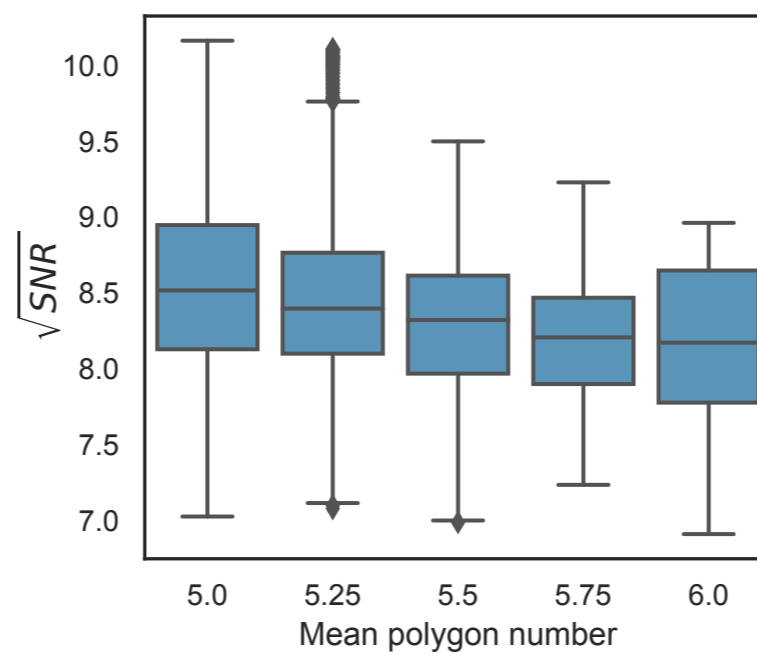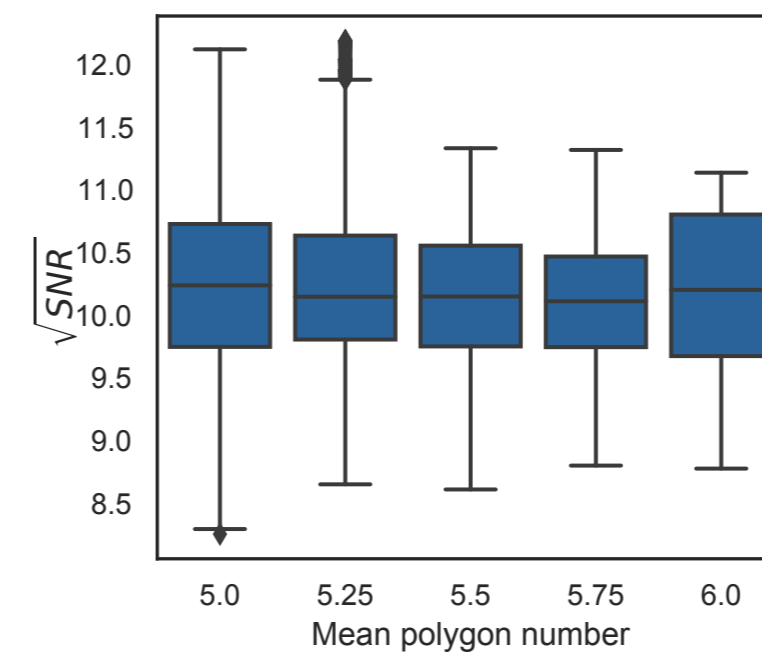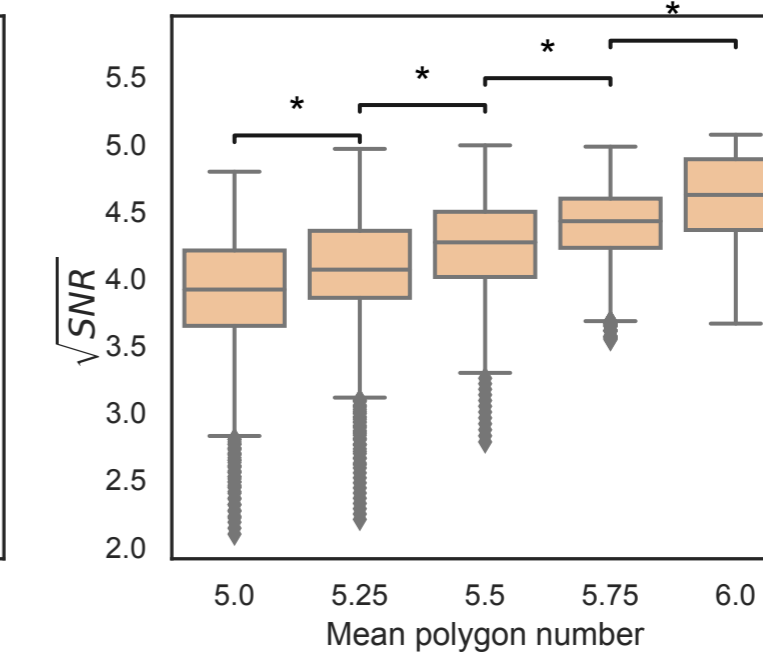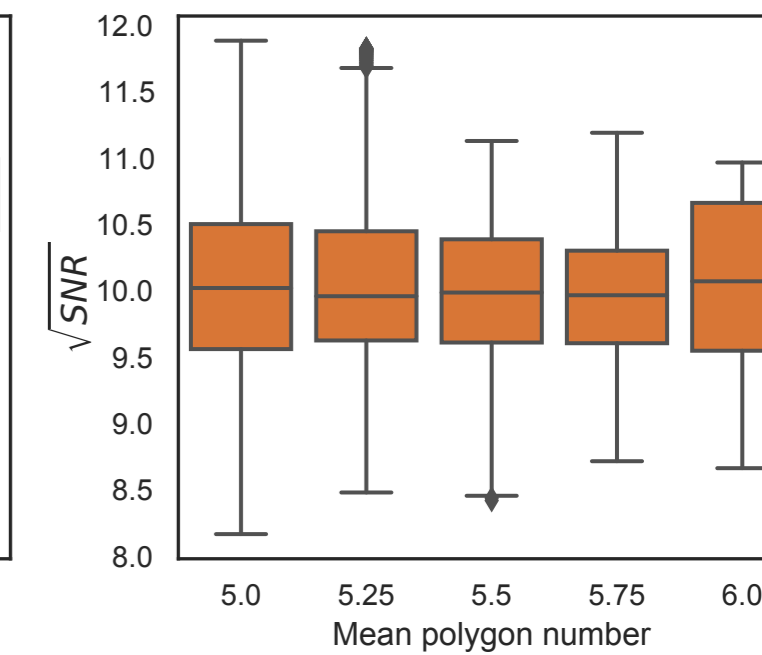

61

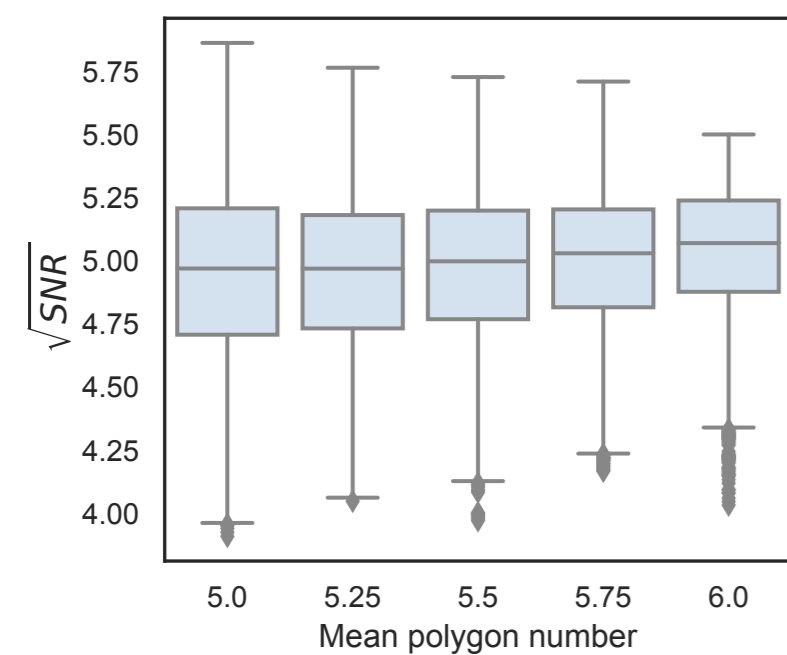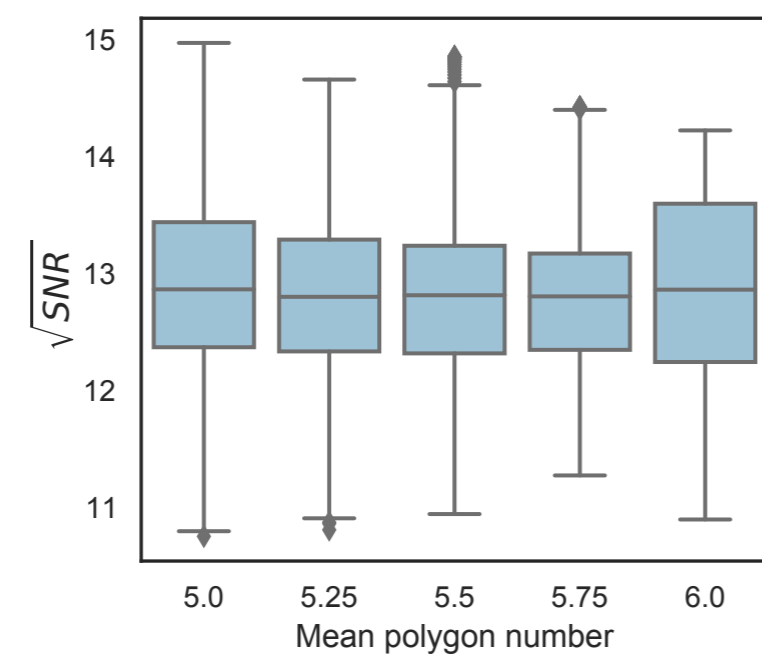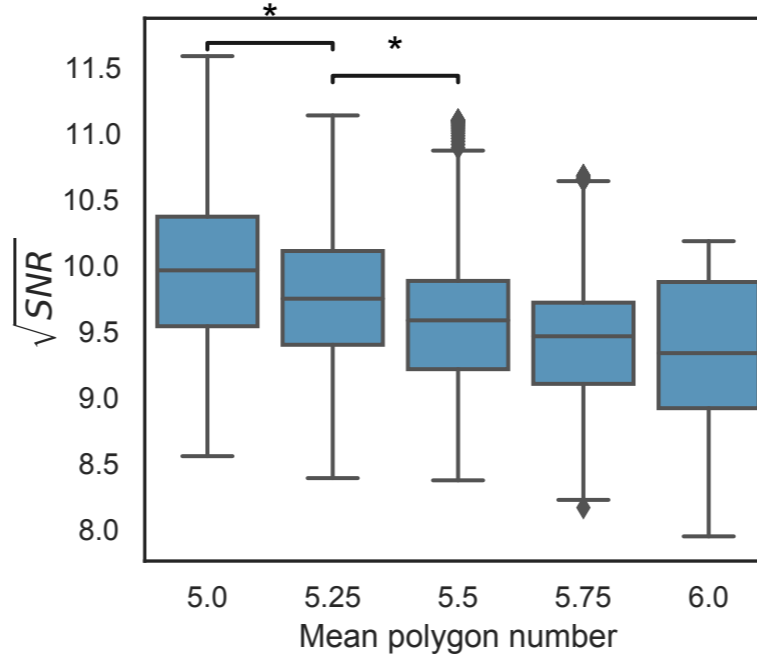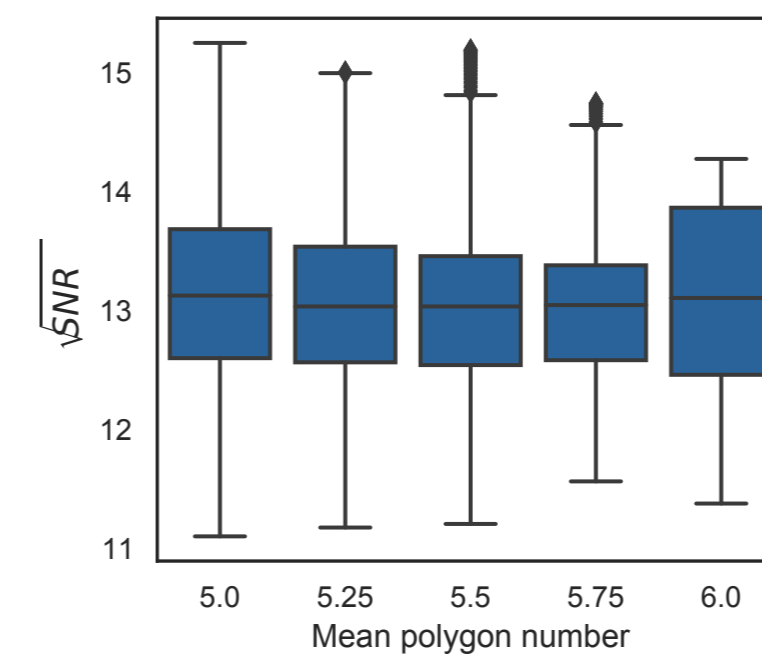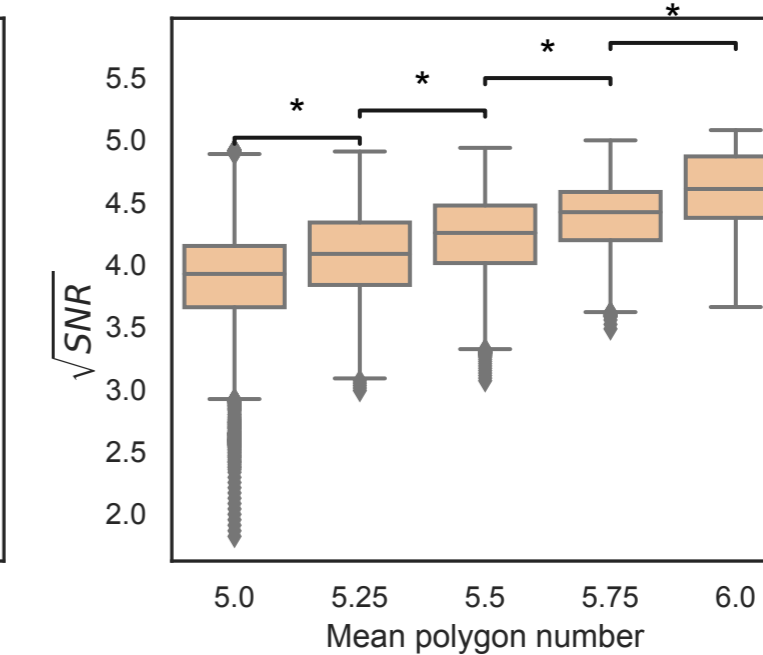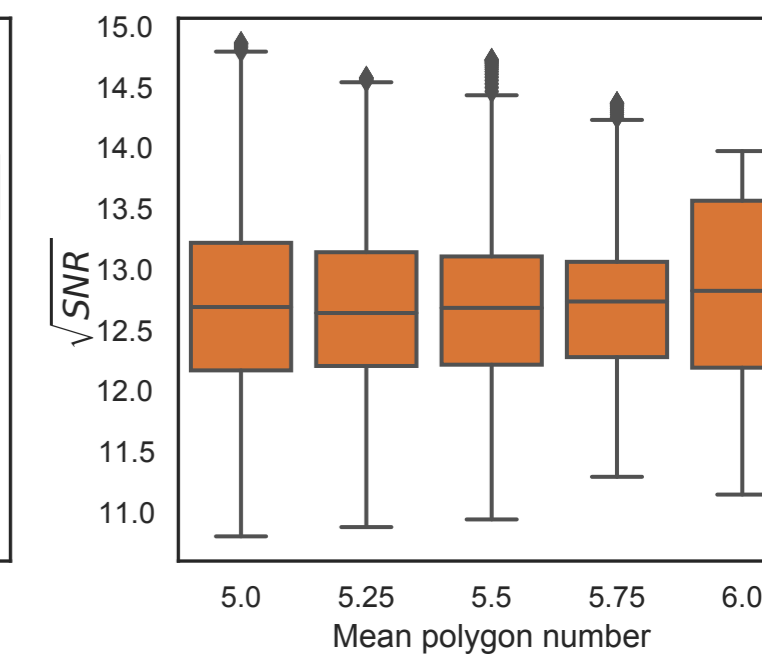

91

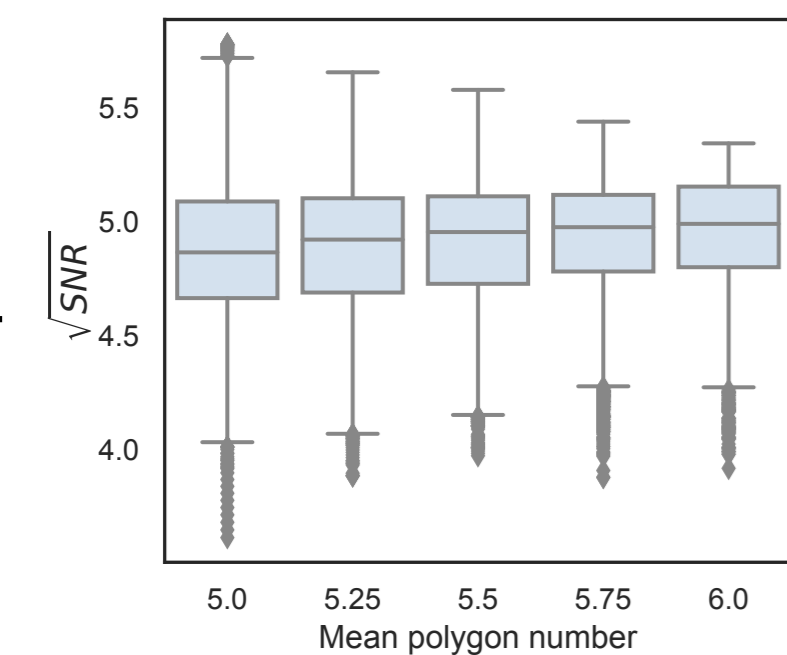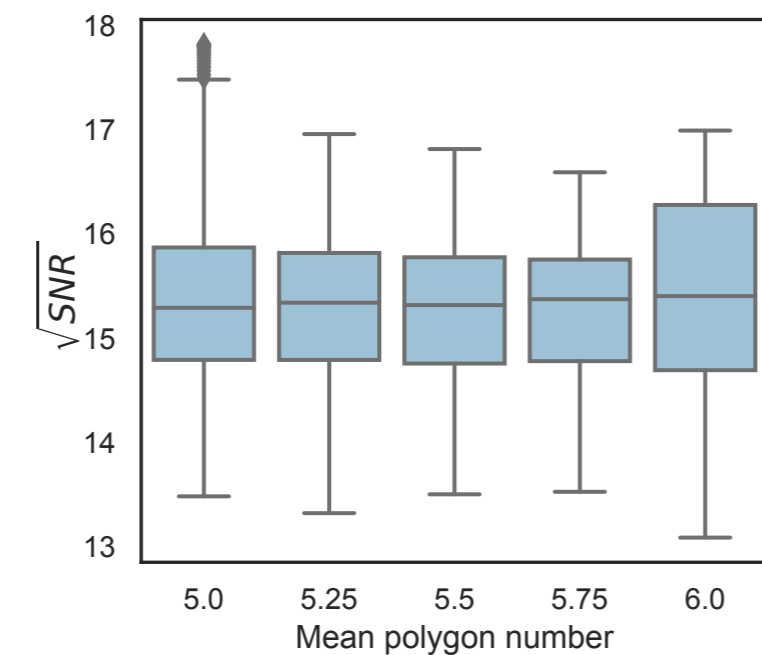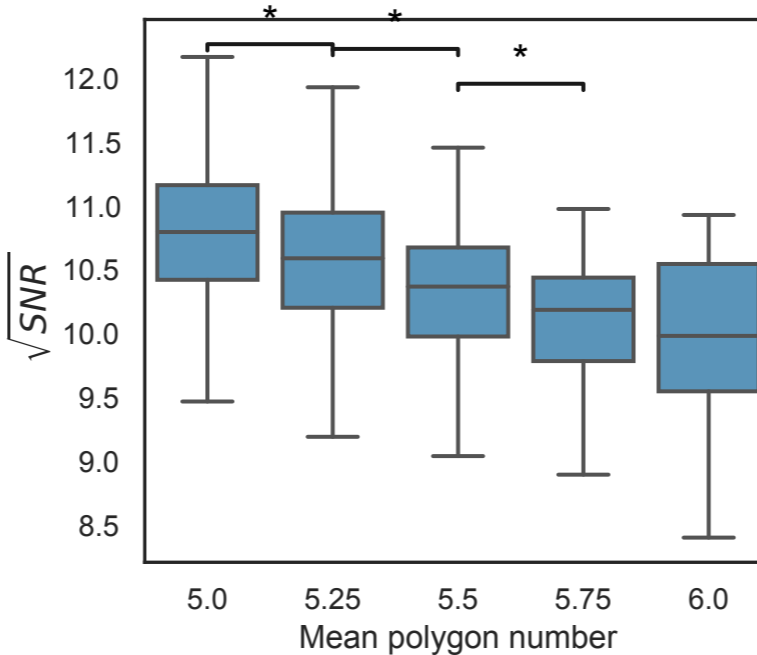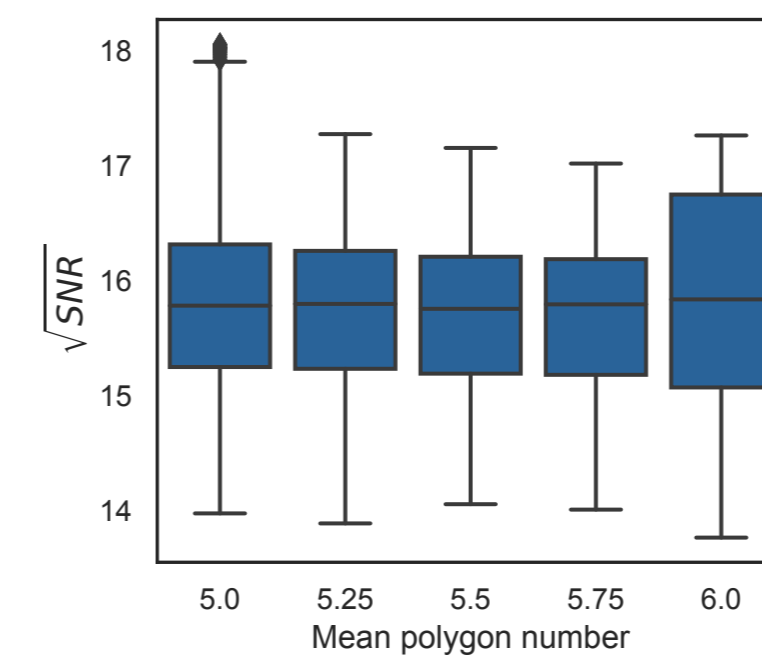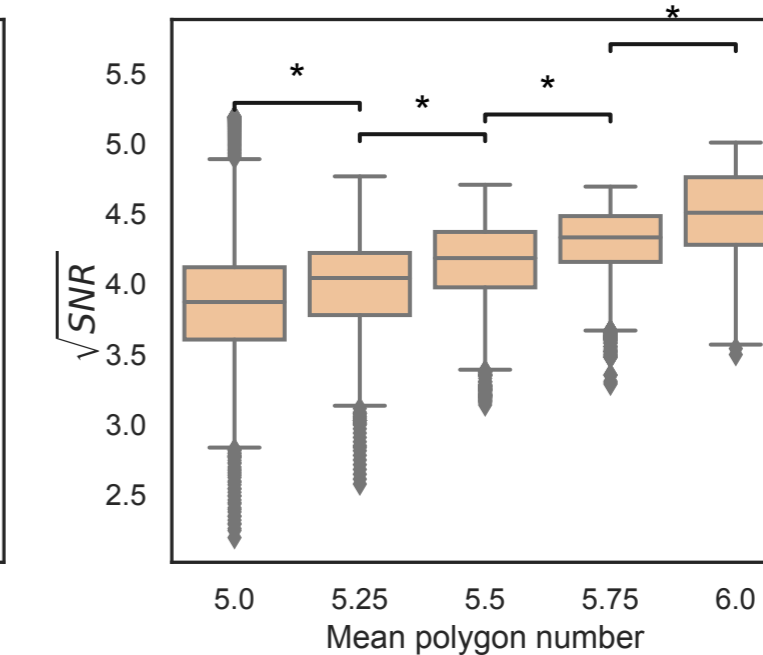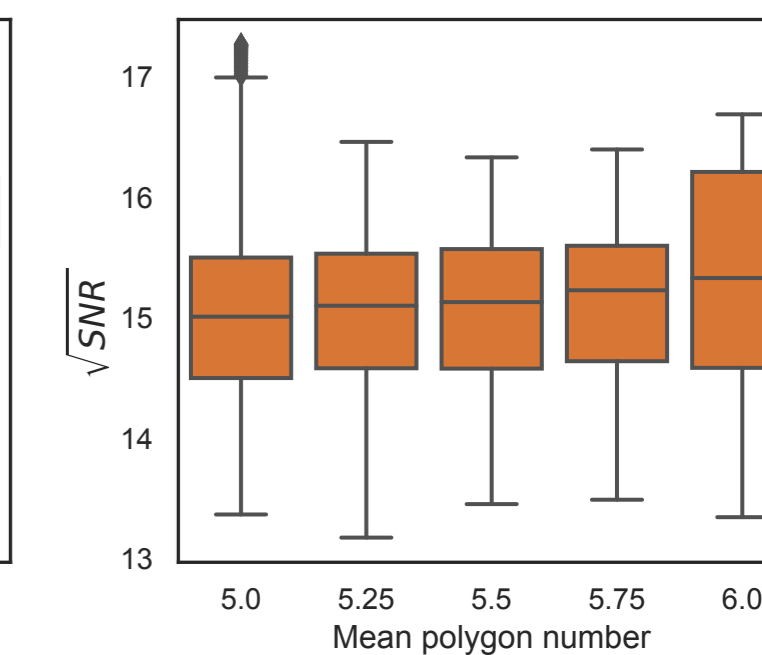

Number of cells

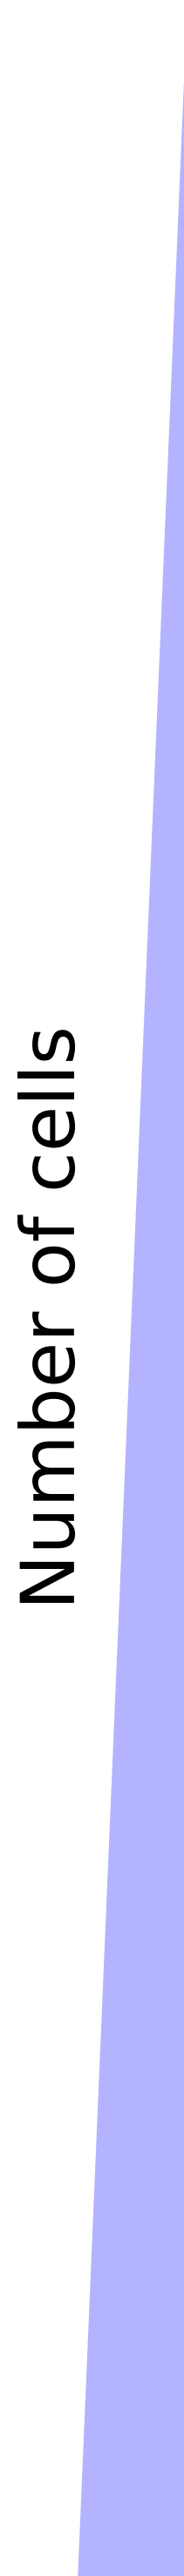

Supplement: pcbi.1009552.s007.pdf [file pcbi.1009552.s007.pdf]
