# Supplementary material for: The role of cell geometry and cell-cell communication in gradient sensing
Source: PubMed Central journal article supplement (PMC8963572; doi:10.1371/journal.pcbi.1009552), 2022-03-14

**A**

$$\lambda = 1.0 \text{ s}^{-1}; l_E = 7.1 \text{ } \mu\text{m}; N_m = 6$$

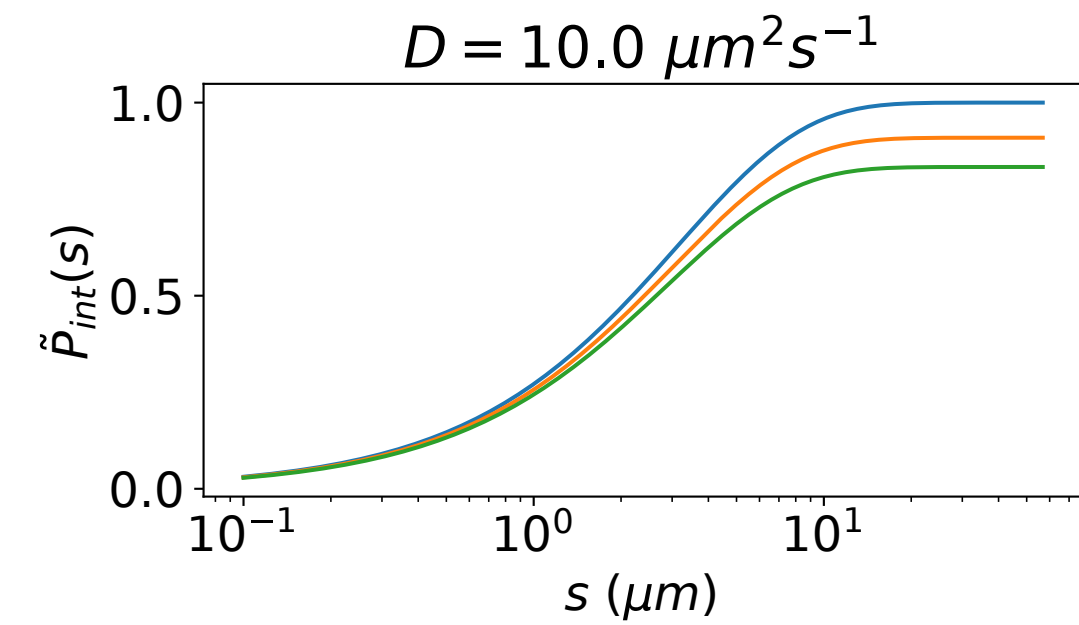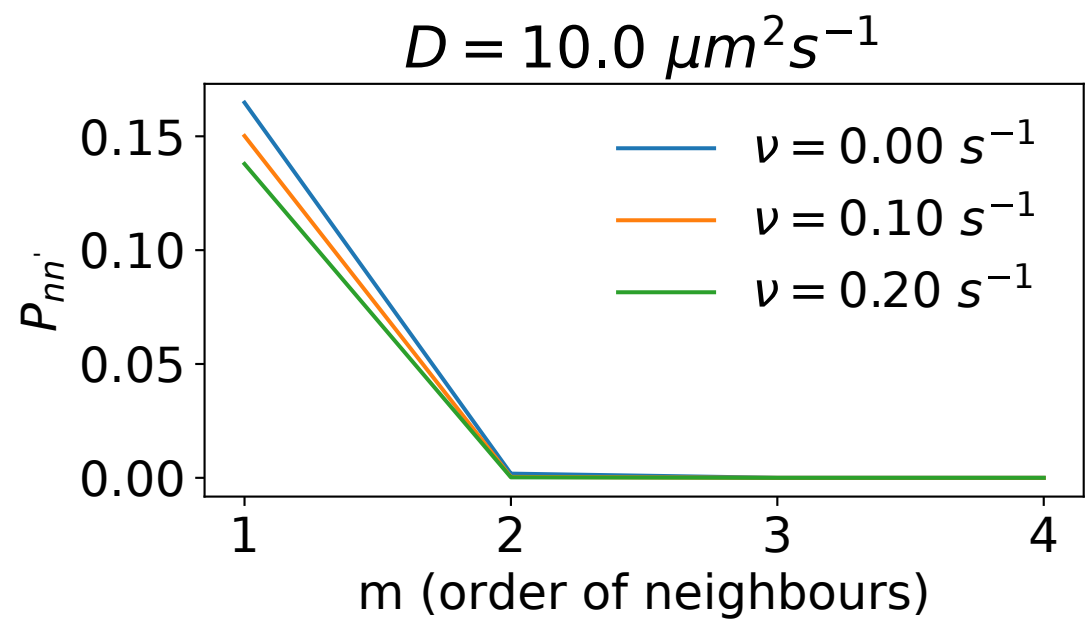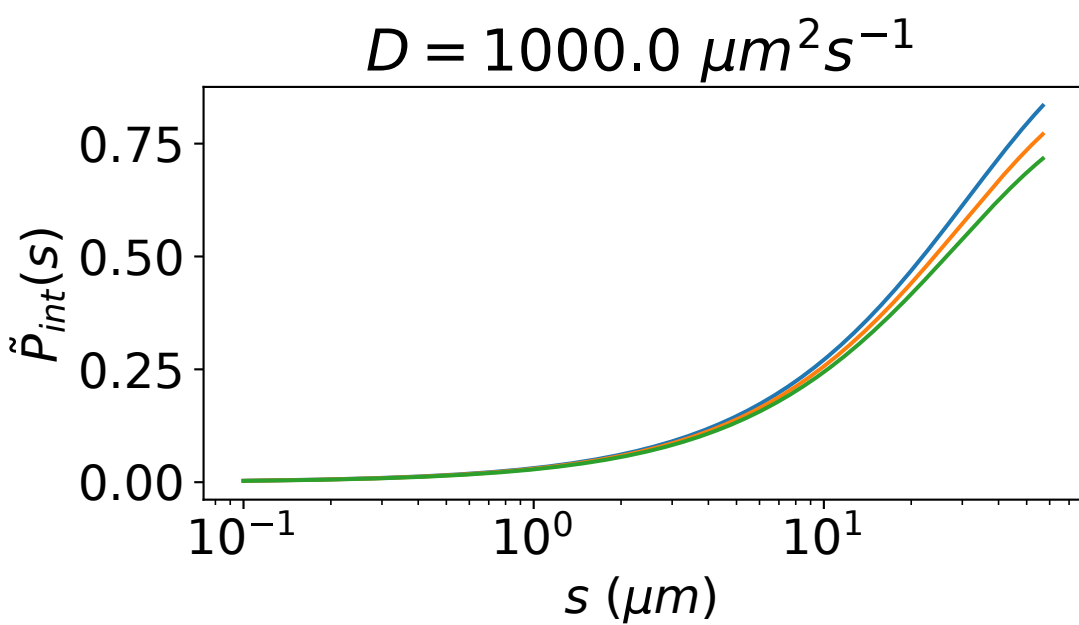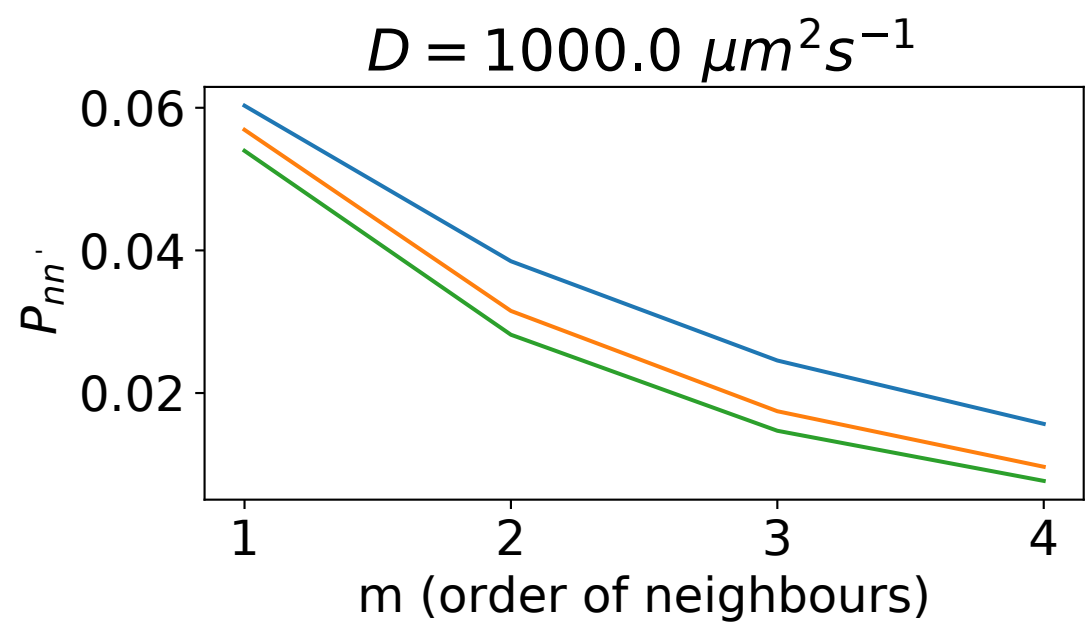**B**

$$\lambda = 1.0 \text{ s}^{-1}; l_E = 7.1 \text{ } \mu\text{m}; N_m = 5$$

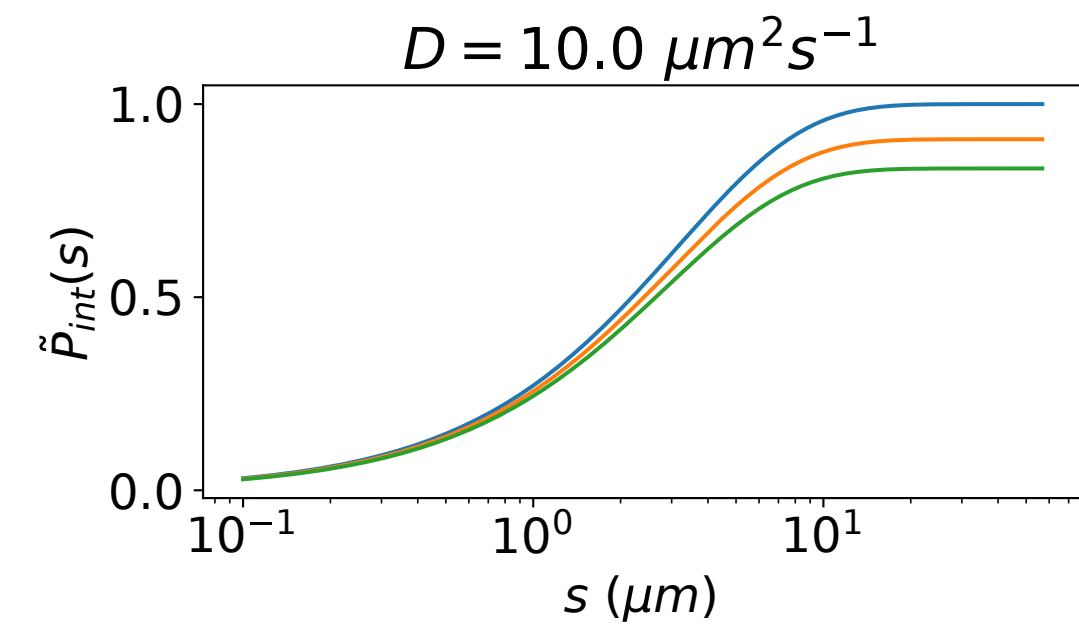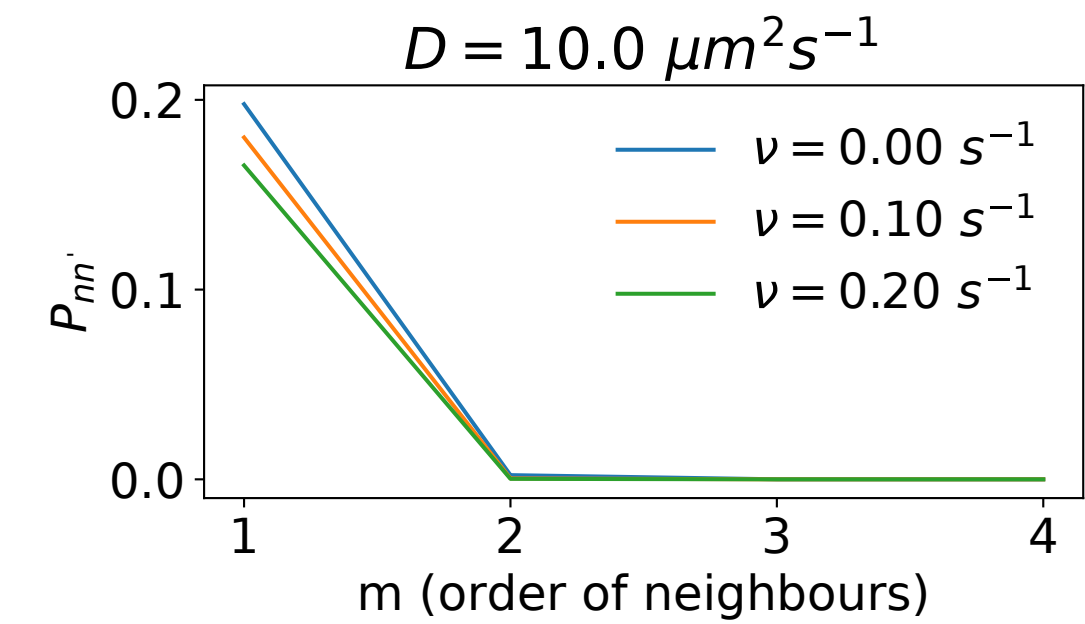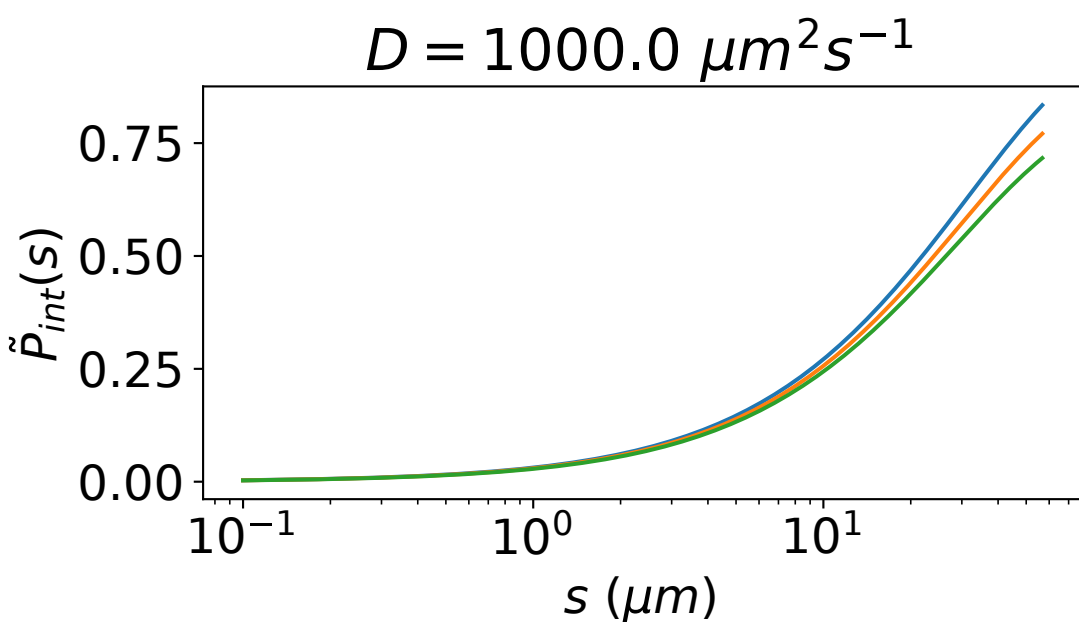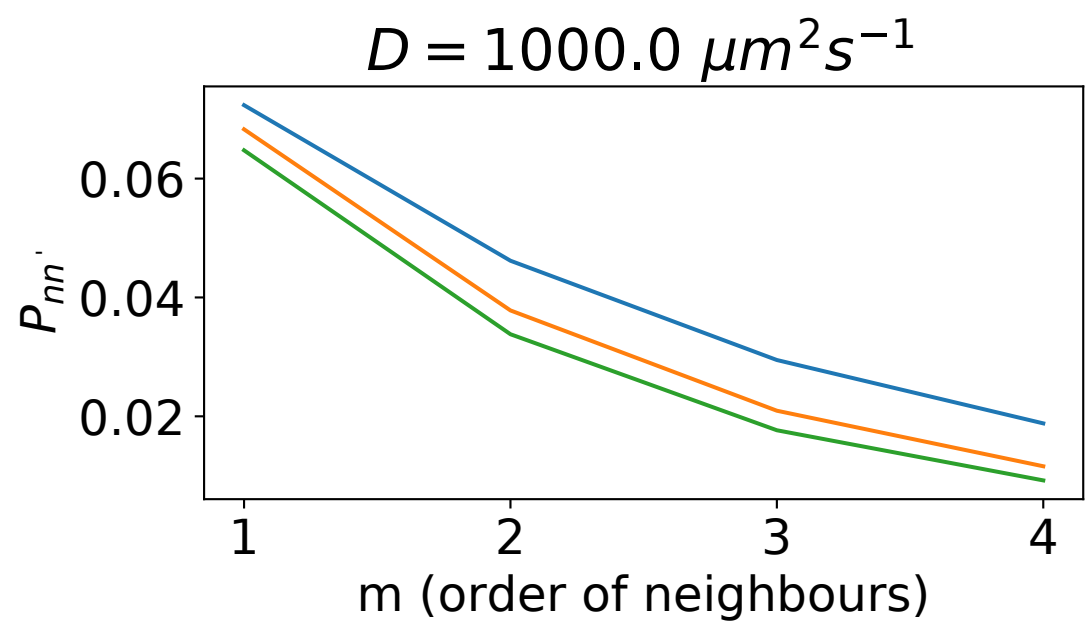

Supplement: pcbi.1009552.s002.pdf [file pcbi.1009552.s002.pdf]
