# Supplementary material for: The role of cell geometry and cell-cell communication in gradient sensing
Source: PubMed Central journal article supplement (PMC8963572; doi:10.1371/journal.pcbi.1009552), 2022-03-14

**A****Weak - local (ISD)**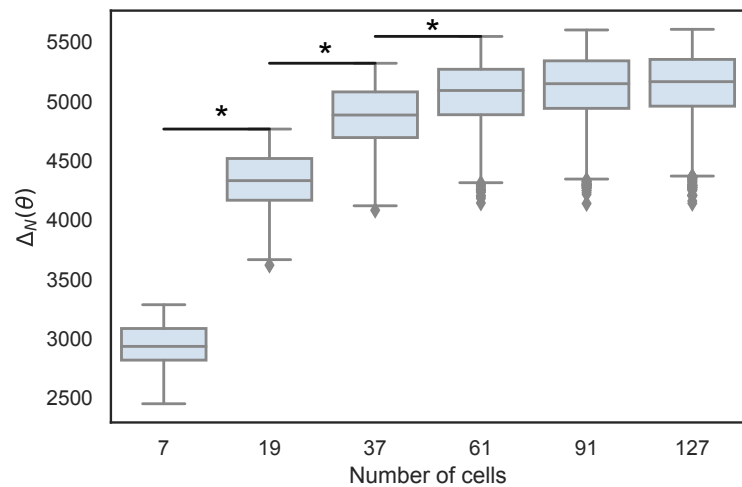**B****Weak (NNE)**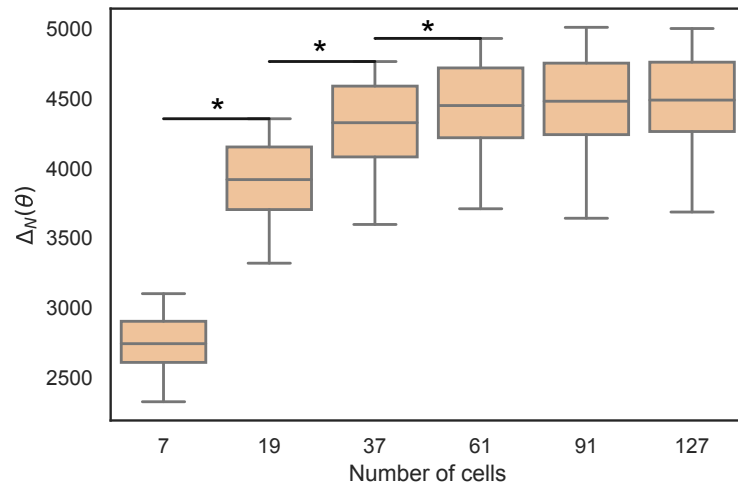**C**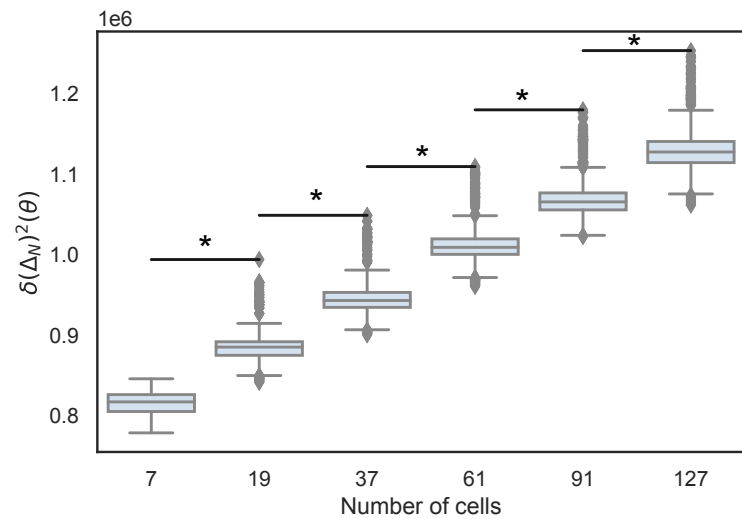**D**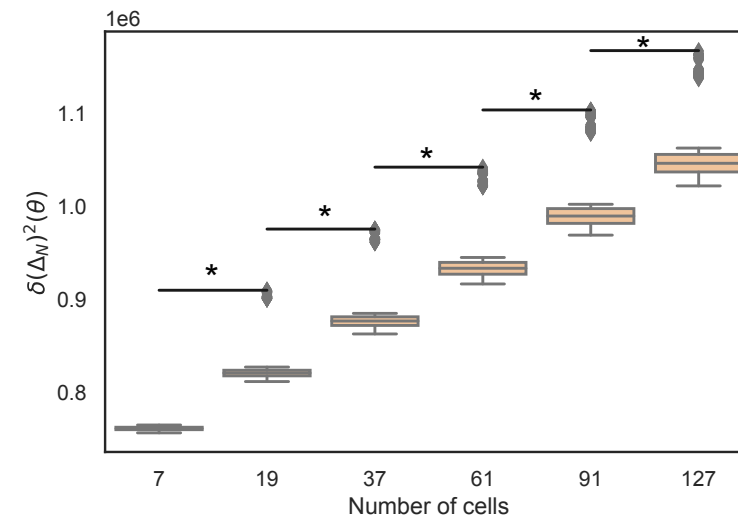

Supplement: pcbi.1009552.s004.pdf [file pcbi.1009552.s004.pdf]
