# Supplementary material for: The role of cell geometry and cell-cell communication in gradient sensing
Source: PubMed Central journal article supplement (PMC8963572; doi:10.1371/journal.pcbi.1009552), 2022-03-14
Supplement: pcbi.1009552.s009.pdf [file pcbi.1009552.s009.pdf]

| # cells  | ISD        |              |             |               | NNE   |        |
|----------|------------|--------------|-------------|---------------|-------|--------|
|          | Weak-local | Strong-local | Weak-global | Strong-global | Weak  | Strong |
| 7 - 19   | -0.50      | -0.50        | -0.50       | -0.50         | -0.50 | -0.50  |
| 19 - 37  | -0.38      | -0.50        | -0.50       | -0.50         | -0.25 | -0.50  |
| 37 - 61  | NS         | -0.50        | -0.44       | -0.50         | NS    | -0.50  |
| 61 - 91  | NS         | -0.49        | -0.27       | -0.49         | 0.11  | -0.48  |
| 91 - 127 | 0.15       | -0.45        | -0.15       | -0.46         | 0.12  | -0.44  |
