# Supplementary material for: The role of cell geometry and cell-cell communication in gradient sensing
Source: PubMed Central journal article supplement (PMC8963572; doi:10.1371/journal.pcbi.1009552), 2022-03-14
Supplement: pcbi.1009552.s010.pdf [file pcbi.1009552.s010.pdf]

| MPN  | ISD          |               |               |               | NNE          |               |
|------|--------------|---------------|---------------|---------------|--------------|---------------|
|      | Weak-local   | Strong-local  | Weak-global   | Strong-global | Weak         | Strong        |
| 5.0  | [3.28, 4.96] | [3.87, 17.60] | [3.72, 11.23] | [3.89, 18.35] | [2.98, 3.91] | [3.88, 17.12] |
| 5.25 | [3.25, 4.96] | [3.85, 17.58] | [3.69, 10.95] | [3.86, 18.30] | [3.00, 4.09] | [3.85, 17.19] |
| 5.5  | [3.26, 4.97] | [3.84, 17.53] | [3.67, 10.68] | [3.85, 18.23] | [3.04, 4.25] | [3.84, 17.23] |
| 5.75 | [3.24, 4.99] | [3.79, 17.55] | [3.63, 10.45] | [3.80, 18.23] | [3.09, 4.39] | [3.79, 17.32] |
| 6.0  | [3.25, 5.04] | [3.82, 21.76] | [3.65, 10.42] | [3.83, 23.17] | [3.14, 4.60] | [3.82, 21.46] |
