# Supplementary material for: The role of cell geometry and cell-cell communication in gradient sensing
Source: PubMed Central journal article supplement (PMC8963572; doi:10.1371/journal.pcbi.1009552), 2022-03-14
Supplement: pcbi.1009552.s011.pdf [file pcbi.1009552.s011.pdf]

---

| MPN        | Weak-global (ISD) | Weak (NNE) |
|------------|-------------------|------------|
| 5.0 - 5.25 | 0.14              | NS         |
| 5.25 - 5.5 | 0.13              | -0.13      |
| 5.5 - 5.75 | 0.13              | -0.19      |
| 5.75 - 6.0 | NS                | -0.21      |
| 5.0 - 6.0  | 0.37              | -0.42      |

---
