# Supplementary material for: The role of cell geometry and cell-cell communication in gradient sensing
Source: PubMed Central journal article supplement (PMC8963572; doi:10.1371/journal.pcbi.1009552), 2022-03-14
Supplement: pcbi.1009552.s012.pdf [file pcbi.1009552.s012.pdf]

| # cells | ISD          |                |                |                | NNE          |                |
|---------|--------------|----------------|----------------|----------------|--------------|----------------|
|         | Weak-local   | Strong-local   | Weak-global    | Strong-global  | Weak         | Strong         |
| 7       | [3.24, 3.28] | [3.79, 3.87]   | [3.63, 3.72]   | [3.80, 3.89]   | [2.98, 3.14] | [3.79, 3.88]   |
| 19      | [4.56, 4.61] | [7.00, 7.17]   | [6.27, 6.52]   | [7.04, 7.21]   | [3.77, 4.31] | [6.99, 7.14]   |
| 37      | [4.91, 5.01] | [10.00, 10.14] | [8.16, 8.56]   | [10.11, 10.27] | [3.91, 4.60] | [9.96, 10.06]  |
| 61      | [4.96, 5.04] | [12.77, 12.89] | [9.34, 9.97]   | [13.00, 13.15] | [3.88, 4.59] | [12.67, 12.80] |
| 91      | [4.86, 4.96] | [15.27, 15.40] | [9.99, 10.79]  | [15.69, 15.81] | [3.85, 4.49] | [15.03, 15.30] |
| 127     | [4.71, 4.84] | [17.53, 17.71] | [10.30, 11.23] | [18.23, 18.39] | [3.67, 4.38] | [17.12, 17.56] |
